# Supplementary material for: HER catalytic activity and regulation of a transition metal atom-anchored BC3 monolayer: a first-principles study
Source: Royal Society of Chemistry journal article supplement (doi:10.1039/d3cp04660e), 2023-11-25
Supplement: d3cp04660e1.pdf [file d3cp04660e1.pdf]

## Supporting Information

HER catalytic activity and regulation of transition metal atom anchored

BC<sub>3</sub> monolayer: A first-principles study

Liyang Pan,<sup>a</sup> Xuxin Kang,<sup>a</sup> Shan Gao<sup>\*a,b</sup> and Xiangmei Duan<sup>\*a,b</sup>

<sup>a</sup>. School of Physical Science and Technology, Ningbo University, China

<sup>b</sup>. Laboratory of Clean Energy Storage and Conversion, Ningbo University, China

**Table S1** Hydrogen adsorption energy (in eV) at different adsorption sites in the TM@BC<sub>3</sub> system. Slashes indicate non-adsorption cases.

|    | Ti    | Fe    | Cu    | Zn    | Mo    | Ag    | Au    |
|----|-------|-------|-------|-------|-------|-------|-------|
| C1 | 0.48  | 0.11  | 0.19  | 0.20  | 0.38  | 0.15  | 0.14  |
| C2 | 0.72  | 0.16  | 0.56  | 0.55  | -0.04 | 0.55  | 0.44  |
| C3 | 0.16  | -0.22 | -0.10 | -0.20 | -0.25 | -0.05 | -0.04 |
| C4 | 0.68  | 0.58  | 0.57  | 0.57  | 0.55  | 0.58  | 0.60  |
| C5 | /     | 0.75  | 0.68  | /     | /     | 0.69  | 0.68  |
| M  | -0.05 | 0.15  | /     | -0.38 | -0.28 | 0.22  | -0.25 |
| B1 | 0.11  | 0.56  | 0.26  | 0.26  | 0.06  | 0.23  | 0.21  |
| B2 | -1.23 | -0.43 | -0.81 | -0.77 | -0.79 | -0.52 | -0.32 |

**Table S2** Hydrogen adsorption energy (in eV) at different adsorption sites in the O/TM@BC<sub>3</sub> system. Slashes indicate non-adsorption cases.

|    | Ti   | Cu    | Zn    | Mo    |
|----|------|-------|-------|-------|
| C1 | 0.57 | -0.47 | 0.18  | 0.20  |
| C2 | 0.93 | 0.52  | 0.83  | 0.38  |
| C3 | 0.60 | -0.53 | 0.00  | -0.87 |
| C4 | 0.50 | 0.00  | 0.38  | 0.58  |
| C5 | 0.68 | 0.50  | 0.68  | 0.86  |
| M  | 0.81 | /     | 0.70  | -0.62 |
| B1 | 0.90 | 0.54  | 0.71  | 0.81  |
| B2 | 1.68 | /     | 1.73  | -0.63 |
| O  | 0.48 | -1.19 | -0.25 | -1.08 |
